# Supplementary material for: The importance of choosing the right strategy to treat small cell carcinoma of the cervix: a comparative analysis of treatments
Source: PubMed Central journal article supplement (PMC8461987; doi:10.1186/s12885-021-08772-x), 2021-09-23
Supplement: 12885_2021_8772_MOESM1_ESM.pdf [file 12885_2021_8772_MOESM1_ESM.pdf]

**The importance of choosing the right strategy to treat small cell carcinoma of the cervix: a comparative analysis of treatments**

Mariko Kawamura<sup>1</sup>, Yutaro Koide<sup>2</sup>, Taro Murai<sup>3</sup>, Shunichi Ishihara<sup>4</sup>, Yuuki Takase<sup>1,5</sup>, Takayuki Muraio<sup>6</sup>,  
Dai Okazaki<sup>7</sup>, Takahiro Yamaguchi<sup>8</sup>, Kaoru Uchiyama<sup>9</sup>, Yoshiyuki Itoh<sup>1</sup>, Takeshi Kodaira<sup>2</sup>, Yuta  
Shibamoto<sup>3</sup>, Mika Mizuno<sup>10</sup>, Fumitaka Kikkawa<sup>11</sup>, and Shinji Naganawa<sup>1</sup>

Figure A) Differences in survival according to the chemotherapy regimen in each FIGO stage  
 FIGO I-IIA

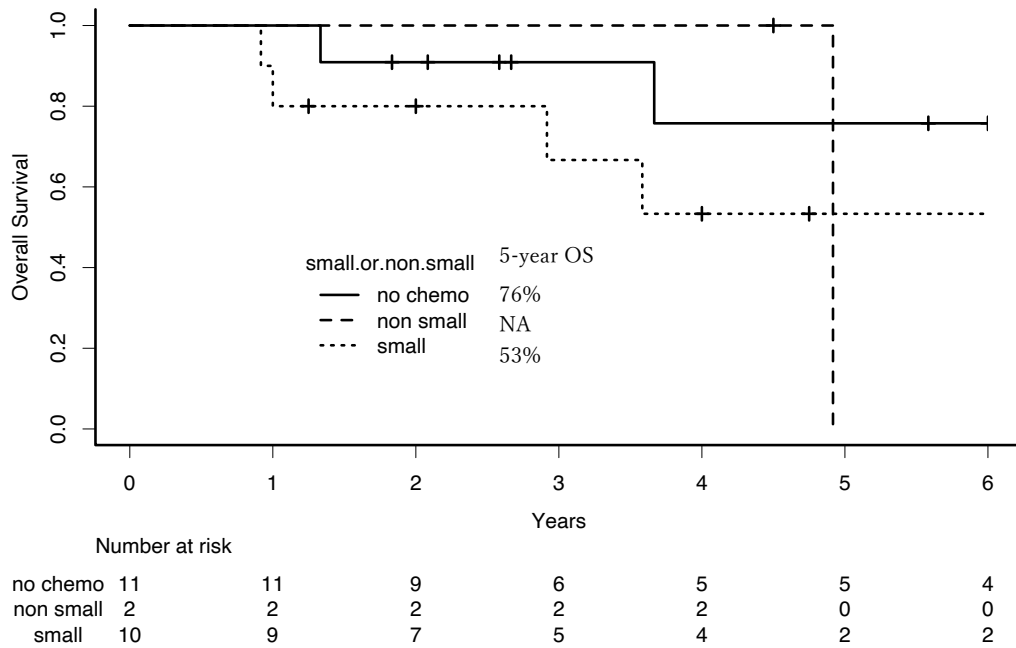

FIGO IIB-IVA

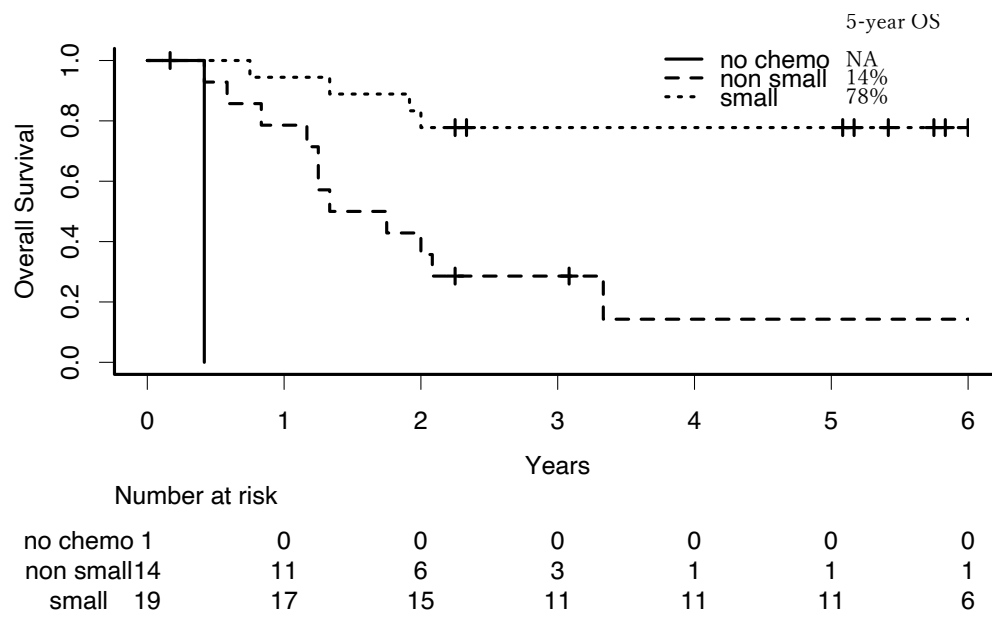

FIGO IVB

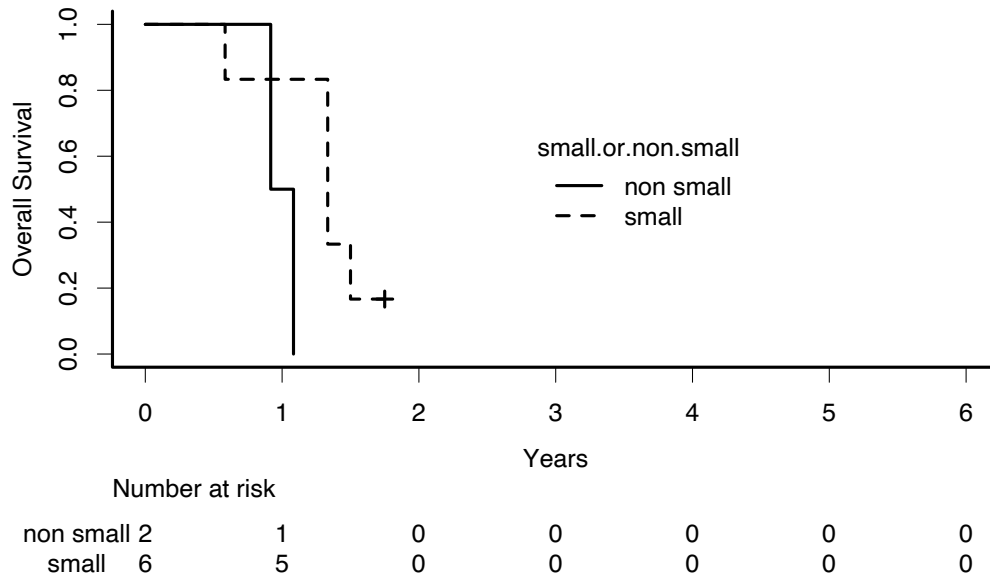

Figure B) Differences in survival with use of IP vs EP

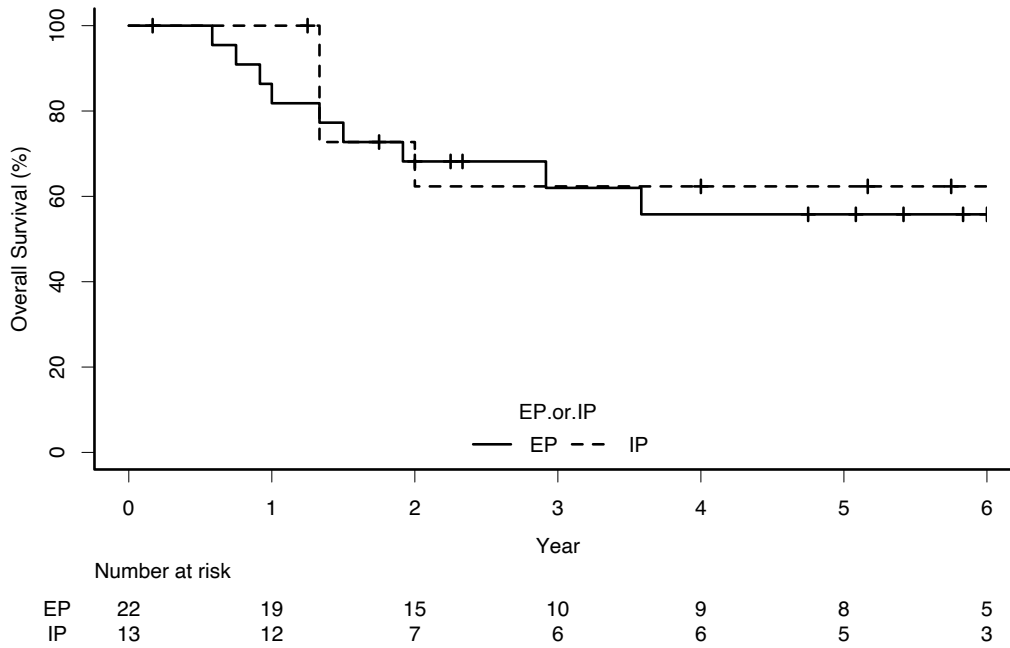

Figure C) Differences in survival according to the chemotherapy regimen for patients treated with CCRT

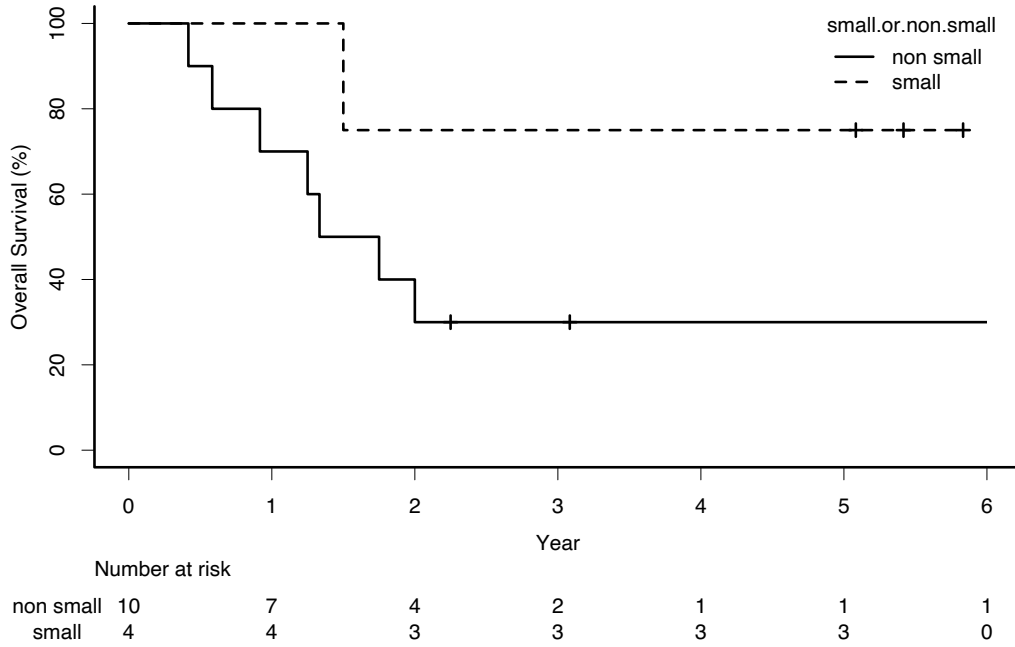

Figure D) Differences in survival according to treatment strategy for non-stage IV (only patients treated with the small cell carcinoma regimen)

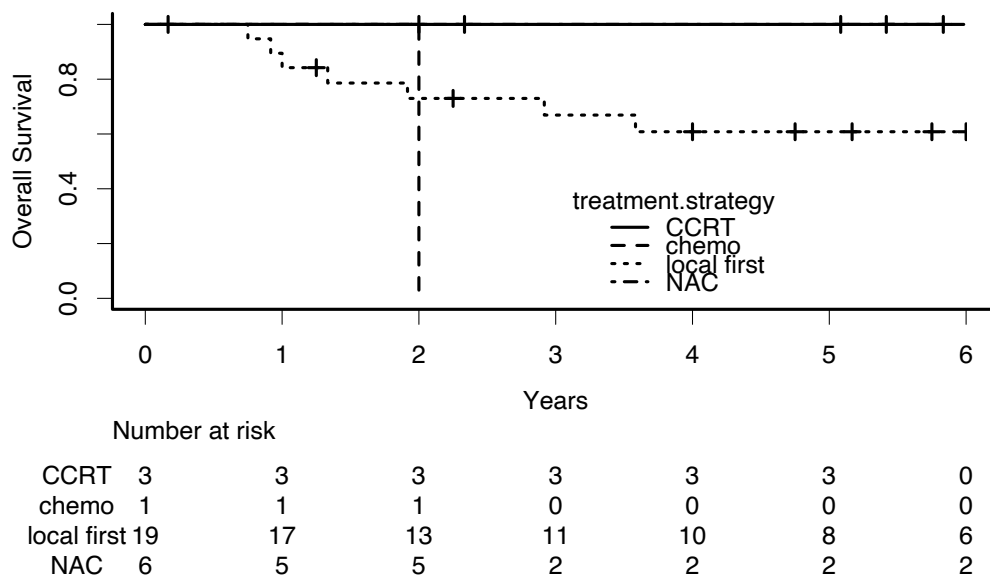

Table E) Characteristics of patients who died from dissemination to the brain and/or meninges.

|   | Age | Tumor size | FIGO 2018 | Treatment strategy   | Chemo          | Chemotherapy courses |
|---|-----|------------|-----------|----------------------|----------------|----------------------|
| 1 | 51  | 26 mm      | IIIC      | Surgery+Chemotherapy | CDDP+VP16      | 6                    |
| 2 | 41  | 110 mm     | IVB       | CCRT                 | wCDDP          | unknown              |
| 3 | 24  | 20 mm      | IIIC      | Surgery+CCRT         | CDDP+VP16      | 3                    |
| 4 | 31  | 18 mm      | IB        | Surgery+Chemotherapy | CBDCA+VP16     | 4                    |
| 5 | 62  | 68 mm      | IVB       | Chemo                | CDDP+VP16      | 5                    |
| 6 | 51  | 80 mm      | IIIC2     | Chemo                | CDDP+CPT11     | 8                    |
| 7 | 47  | 66 mm      | IVB       | Chemo                | CDDP+CPT11     | 6                    |
| 8 | 34  | 54 mm      | IIIC2     | Chemo                | CDDP+CPT11     | 8                    |
| 9 | 64  | 30 mm      | IVB       | Chemo                | Biweekly CPT11 | 10                   |
